# Supplementary material for: A novel NiVP/Pi-based flexible sensor for direct electrochemical ultrasensitive detection of cholesterol
Source: Royal Society of Chemistry journal article supplement (doi:10.1039/d1cc07115g), 2022-01-01
Supplement: d1cc07115g1.pdf [file d1cc07115g1.pdf]

## **A novel NiVP/Pi based flexible sensor for direct electrochemical ultrasensitive detection of cholesterol**

### **Experimental section**

#### **Materials and reagents**

All chemicals and reagents were of analytical grade and used as received without further purification. Potassium dihydrogen phosphate ( $\text{KH}_2\text{PO}_4$ ), dipotassium hydrogen phosphate ( $\text{K}_2\text{HPO}_4$ ), urea ( $\text{CH}_4\text{N}_2\text{O}$ ) and isopropanol ( $\text{C}_3\text{H}_8\text{O}$ ) were procured from Merck. 0.1 M PBS was prepared from the stock solutions of 0.1 M  $\text{KH}_2\text{PO}_4$  and 0.1 M  $\text{K}_2\text{HPO}_4$ . Nickel chloride hexahydrate ( $\text{NiCl}_2 \cdot 6\text{H}_2\text{O}$ , 97%), ammonium metavanadate ( $\text{NH}_4\text{VO}_3$ , 99%), red phosphorus (98%), ammonium fluoride ( $\text{NH}_4\text{F}$ , 98%, crystalline), potassium hydroxide pellets (KOH) and sodium chloride (NaCl) were purchased from Loba Chemie. Sodium hydroxide (NaOH) was obtained from Alfa Aesar. Glucose ( $\text{C}_6\text{H}_{12}\text{O}_6$ , >99%), dopamine hydrochloride ( $\text{C}_8\text{H}_{11}\text{NO}_2 \cdot \text{HCl}$ , >99%), ascorbic acid ( $\text{C}_6\text{H}_8\text{O}_6$ , 99%) and uric acid ( $\text{C}_5\text{H}_4\text{N}_4\text{O}_3$ , >99%) were from Sigma-Aldrich. Deionized water obtained from a Millipore system has been used throughout the experiments. ( $>12 \text{ M}\Omega \text{ cm}^{-1}$ ).

#### **Synthesis of NiVP/Pi**

NiVP/Pi catalyst material was synthesized using previously reported literature.<sup>1</sup> Briefly, the synthesis process of NiVP/Pi material involves two-step, wherein the first step involves the formation of nickel vanadium layer double hydroxides through hydrothermal reaction. Initially, 35 mL aqueous mixture of  $\text{NiCl}_2 \cdot 6\text{H}_2\text{O}$  and  $\text{NH}_4\text{VO}_3$  (2:1 molar ratio) were kept under stirring for 10 min. Later, 18 mmol of urea and ammonium fluoride was added to the reaction mixture, stirred for 30 minutes for homogeneity and solution

was heated hydrothermally at 120 °C for 6 h in Teflon-lined autoclave. After cooling, the precipitate of nickel vanadium layer double hydroxides (NiV(OH)<sub>2</sub>) was washed with (1:1) water and ethanol mixture (3×10 mL) and dried overnight at 60 °C. The second step involves the phosphorization reaction, in which as obtained brown NiV(OH)<sub>2</sub> (0.300 g) was mixed with 0.100 g of red phosphorous in 10 mL water and transferred to a microwave vial. Before irradiation, the solution mixture was purged with N<sub>2</sub> gas for 10 minutes and it was irradiated in a Multiwave Pro instrument (Anton Paar) at 100 °C with a 15 min ramp and held for 30 min at 100 °C, under a limiting pressure of 18 bar at 600 watt by controlled temperature programming. The obtained precipitate of NiVP/Pi was filtered and washed (3×30 mL) with deionized water and dried at 60 °C in an oven. Likewise, NiP/Pi and VP/Pi was synthesized under similar reaction conditions using only NiCl<sub>2</sub>.6H<sub>2</sub>O and NH<sub>4</sub>VO<sub>3</sub>, respectively.

### **Physical characterization**

The X-ray powder diffraction (XRD) patterns of NiVP/Pi were collected using PANalytical X'PERT pro diffractometer using Cu K- $\alpha$  radiation ( $\lambda=0.1542$  nm, 40 KV, 40 mA) in the range of 10-80° at a scan speed of 2° per minute. The morphology and elemental distribution of the catalyst was recorded using field scanning microscopy (FESEM; SUPRA 55 VP- 4132 CARL ZEISS). Further, high resolution transmission electron microscopy (HR-TEM) was employed to characterize in depth morphology using FEI Tecnai (G2 F20), Netherlands operating at 200 keV. X-ray photoelectron spectroscopy (XPS) measurements were obtained using Thermo scientific NEXSA surface analysis (working at 72 W, 12000 V), Al K $\alpha$  radiation (1486.6 eV) under ultrahigh vacuum (UHV 8-10 mbar). The spectra were calibrated with respect to C (1s) peak at 284.5 eV with a precision of  $\pm 0.2$  eV.

### **Electrochemical measurements**

All the electrochemical experiments were performed using three-electrode system assembled in a single compartment. Cyclic voltammetry (CV), chronoamperometric and electrochemical impedance

measurements (EIS) experiments were conducted on a Bio-Logic (VSP 300 electrochemical workstation at room temperature. 0.1 M NaOH was used as the electrolyte and catalyst modified Ni foam ((thickness: 1.6 mm, 0.12 cm<sup>2</sup>) used as working electrode (WE), Ag/AgCl/3 M KCl double junction as a reference electrode (RE) and Pt wire as a counter electrode (CE).

For slurry preparation, 1.25 mg of the catalyst sample was dispersed in 500  $\mu$ L of solution containing isopropyl alcohol (IPA, 100  $\mu$ L) and Millipore water (400  $\mu$ L, 12 M $\Omega$ ), and sonicated for about 30 min. Once a homogeneous slurry was attained, the working electrode was prepared by drop-casting 20  $\mu$ L (50  $\mu$ g) of obtained sample slurry on the Ni foam for performing the electrochemical measurements. Prior to use, Ni foam was pretreated with 1 M HCl solution and washed with ethanol and distilled water, respectively. Electrochemical impedance measurements (EIS) were conducted at a DC voltage of 0.54 V over a frequency range between 10 mHz to 3 MHz. Each experiment has been repeated at least 4-5 times to ensure reproducibility.

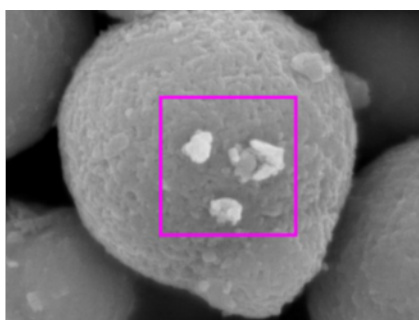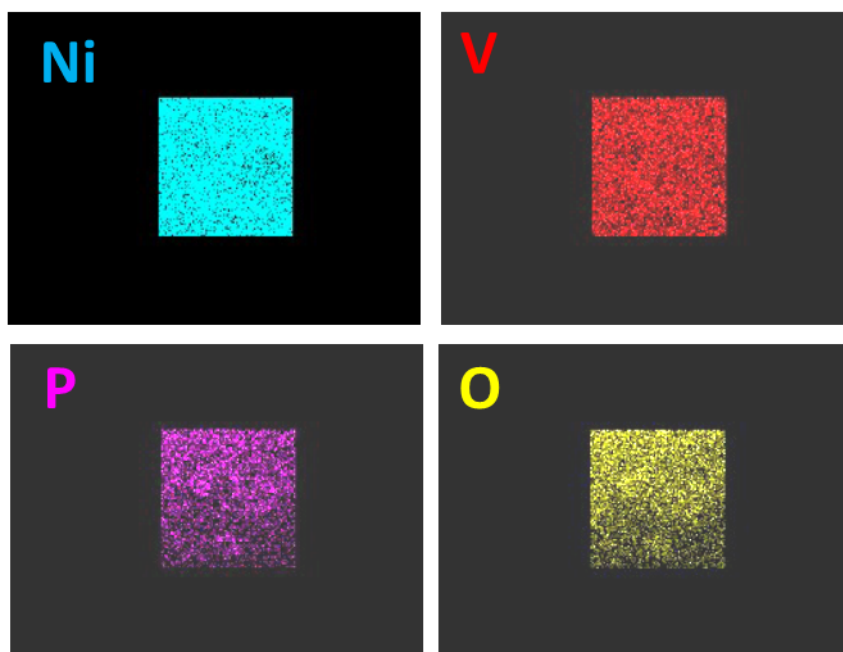

**Figure S1.** EDS dot mapping of Ni, V, P and O elements in NiVP/Pi catalyst.

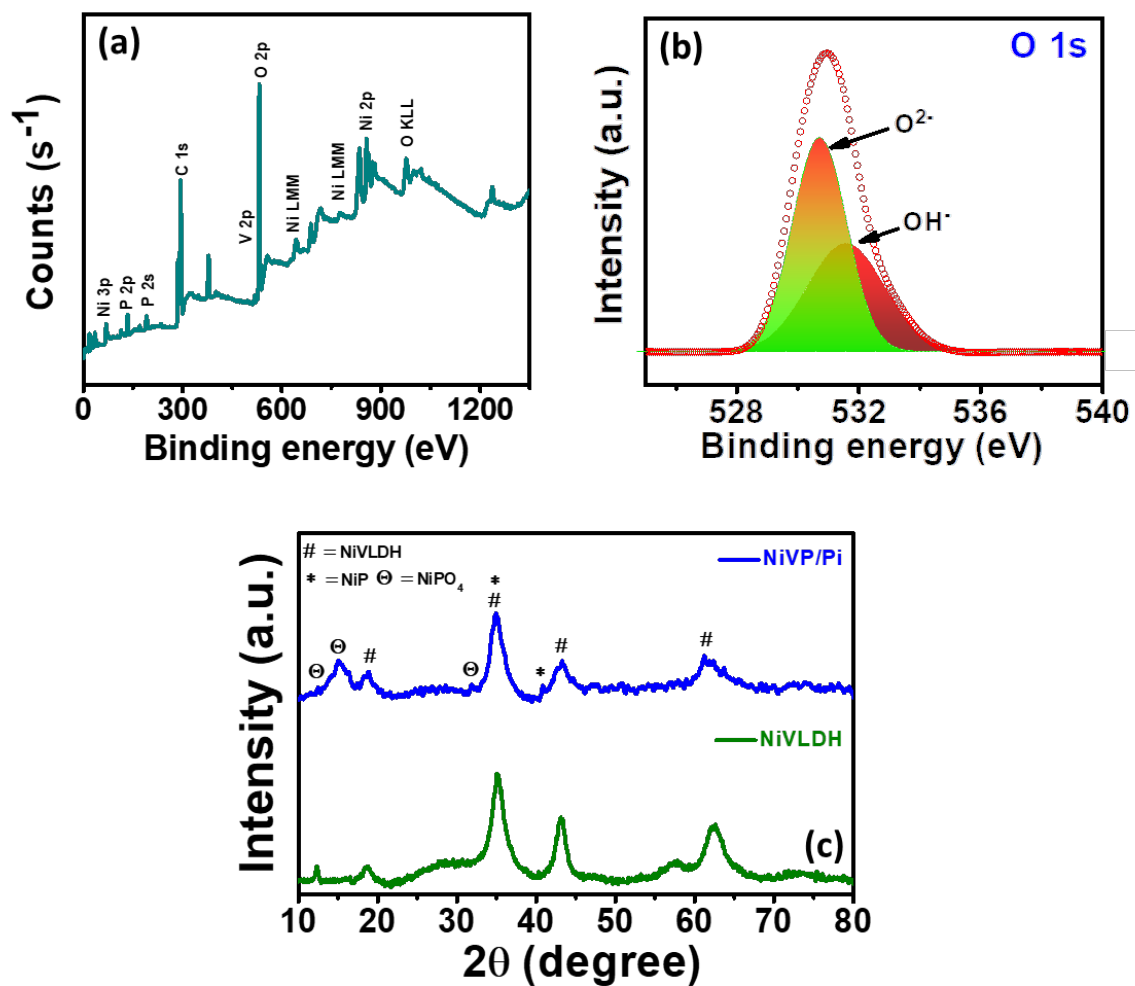

**Figure S2.** (a) XPS survey spectra of NiVP/Pi catalyst, (b) O 1s XPS spectra of NiVP/Pi catalyst and (c) XRD patterns of NiVP/Pi and NiVLDH catalyst.

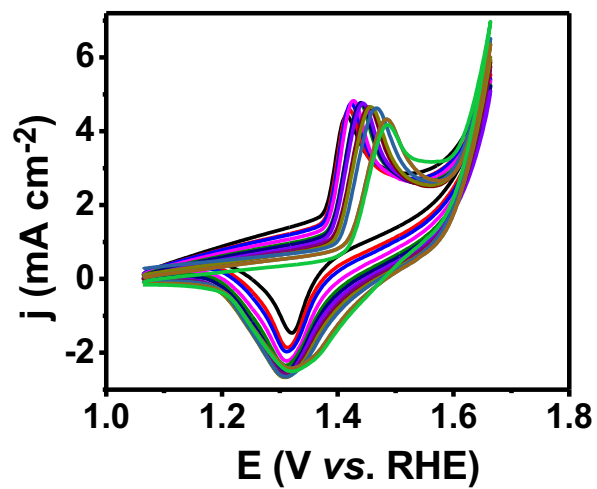

**Figure S3.** CV response of bare Ni foam in 0.1 M NaOH electrolyte containing various conc. of cholesterol at a scan rate of  $5 \text{ mV s}^{-1}$ , CE: Pt wire, RE: double junction Ag/AgCl/3 M KCl.

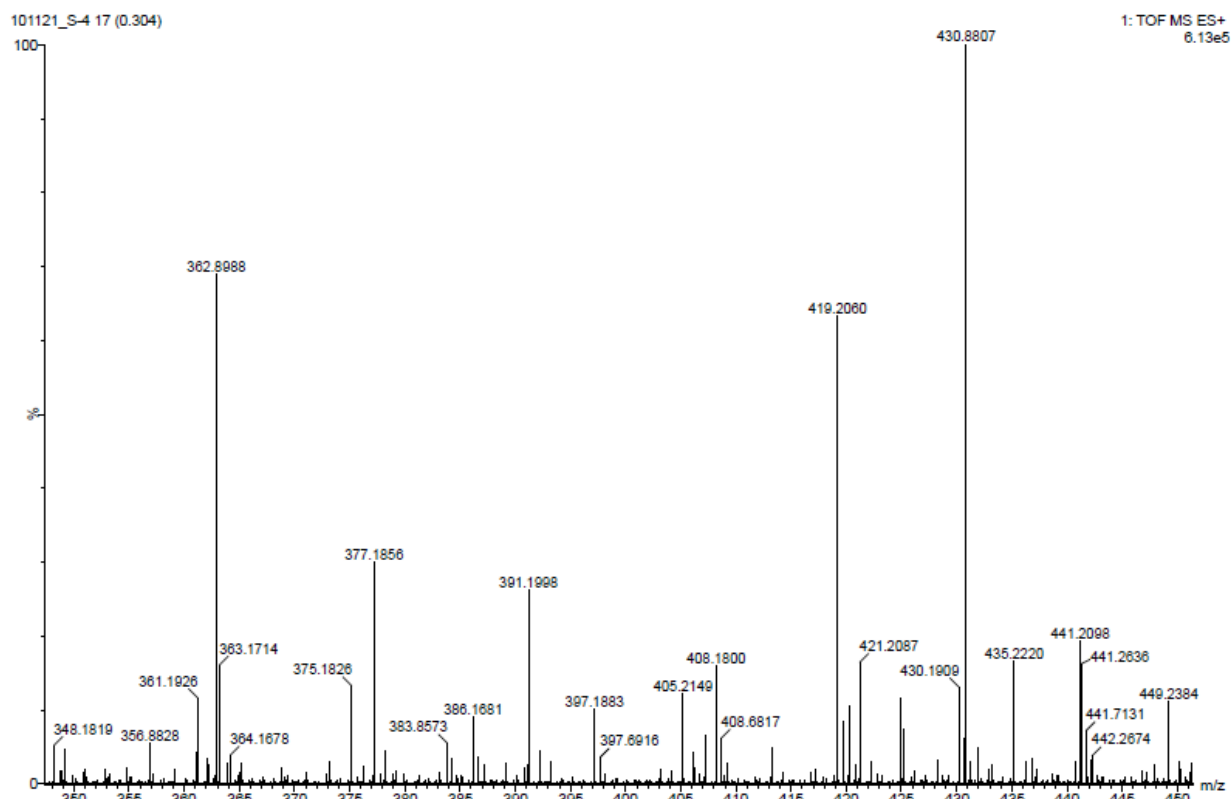

**Figure S4.** HRMS data collected after electrochemical oxidation of cholesterol over NiVP/Pi catalyst in 0.1 M NaOH electrolyte.

|                                        | <b>Cholesterol</b> | <b>Cholest-4-en-3-one</b> | <b>7-ketocholesterol</b> | <b>Cholestane-3-<math>\beta</math>-5-<math>\alpha</math>-6-<math>\beta</math>-triol</b> |
|----------------------------------------|--------------------|---------------------------|--------------------------|-----------------------------------------------------------------------------------------|
| <b>Parent peak</b>                     | 386.1              | 383.8                     | --                       | 419.2                                                                                   |
| <b>Adduct with Na<sup>+</sup></b>      | 408.81             | --                        | --                       | 442.2                                                                                   |
| <b>Adduct with Na<sup>+</sup> - 2H</b> | --                 | 405.2                     | 421.2                    | 441.2                                                                                   |

**HR-MS analysis:** To understand the product of the electrooxidation of cholesterol, the LC-MS measurement was accomplished using the electrolyte. CV measurement was performed with NiVP/Pi catalyst in 0.1 M NaOH electrolyte containing 500  $\mu$ M of cholesterol. Fig. S4 clearly demonstrates the formation of oxidized products, describing the electro-oxidation of cholesterol.

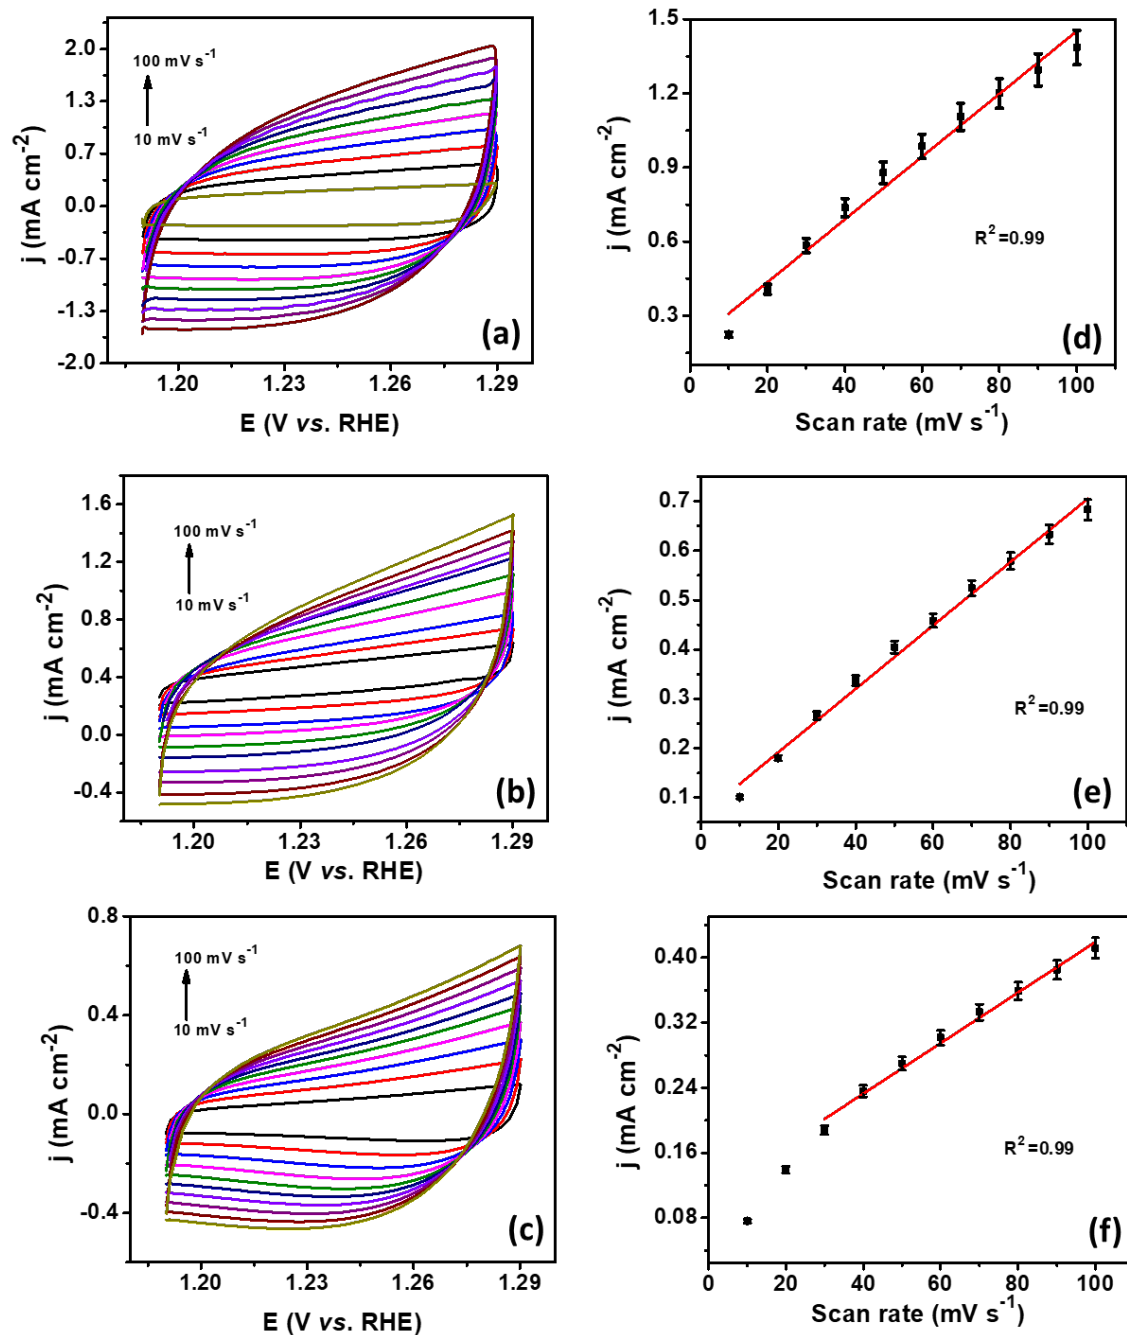

**Figure S5.** Cyclic voltammograms for (a) NiVP/Pi, (b) NiP/Pi and (c) VP/Pi catalyst at varying scan rates in the non-faradic potential region and inset; corresponding average current density versus scan rate in the presence of 5 mM cholesterol CE: Pt wire, RE: double junction Ag/AgCl/3 M KCl.



### Electrochemical surface area (ECSA)

The electrochemical surface area of the catalyst was determined by computing the double-layer pseudo-capacitance ( $C_{dl}$ ) in the non-faradaic region in 0.1 M NaOH with an analyte solution. Cyclic voltammetry was performed in non-faradic region in potential range from 0.32 V to 0.42 V vs. Ag/AgCl/3 M KCl double junction at various scan rates (10 to 100  $\text{mV s}^{-1}$ ). Thereafter, slope of the plot between averaged current density of anodic and cathodic current  $(I_a+I_c)/2$  (where, 'a' denotes anodic current and 'c' is for cathodic current) vs. the scan rate at 0.37 V (vs. Ag/AgCl/3 M KCl) was calculated, which gives pseudo-capacitance.  $C_{dl}$  on dividing with the specific capacitance ( $C_s$ ) of the flat standard surface (20-60  $\mu\text{F cm}^{-2}$ ), which is considered to be 40  $\mu\text{F cm}^{-2}$ , gives electrochemical surface area (ECSA).<sup>1</sup>

#### ECSA calculation:

$$\text{ECSA} = C_{dl} / C_s$$

**Table S1: Electrochemical surface area (ECSA) analysis.**

| S.No. | Catalyst | $C_{dl}$ ( $\mu\text{F}$ ) at 0.37 V (vs. Ag/AgCl/3 M KCl) | ECSA ( $\text{cm}^2$ ) |
|-------|----------|------------------------------------------------------------|------------------------|
| 1.    | NiVP/Pi  | 1906.5                                                     | 47.5                   |
| 3.    | NiP/Pi   | 963                                                        | 24                     |
| 4.    | VP/Pi    | 466.5                                                      | 11.6                   |

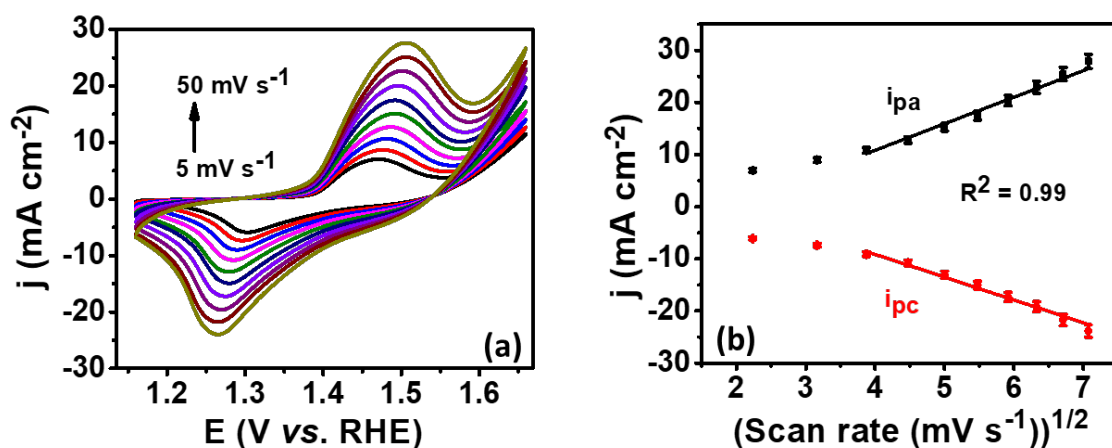

**Figure S6.** (a) Cyclic voltammograms of NiVP/Pi catalyst at various scan rates, and (b) corresponding average current density vs. scan rate in 0.1 M NaOH electrolyte containing 10  $\mu\text{M}$  cholesterol CE: Pt wire, RE: double junction Ag/AgCl/3 M KCl.

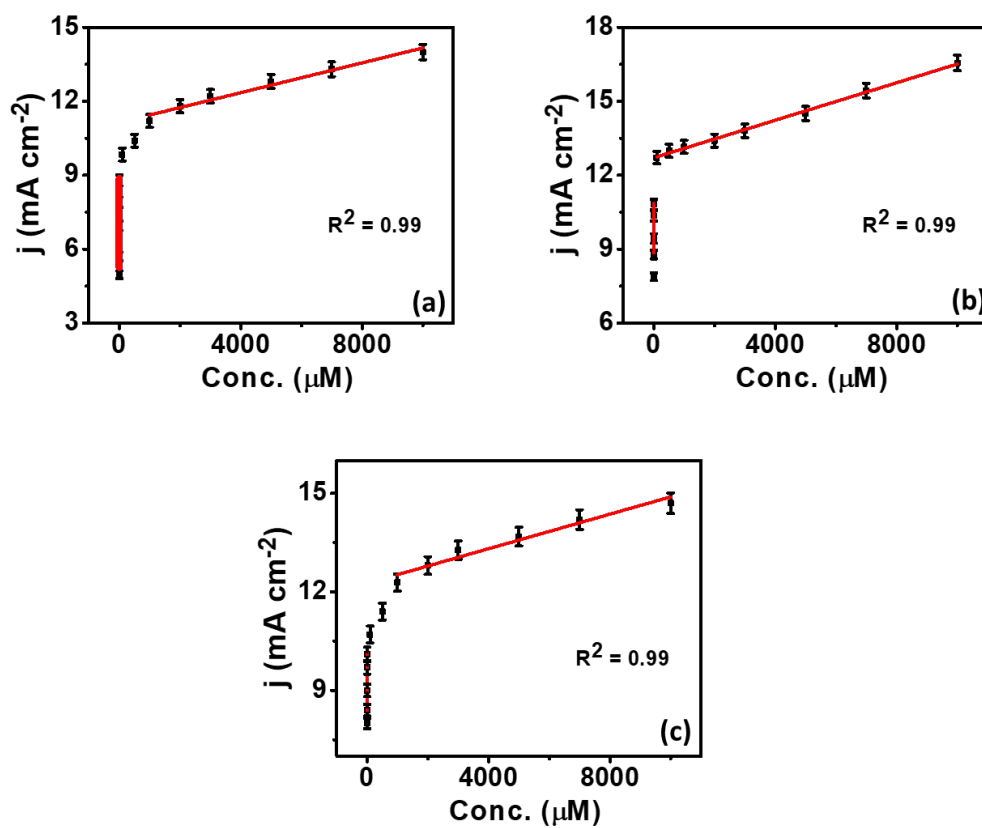

**Figure S7.** Plot of current density vs. concentration of cholesterol for NiVP/Pi over paper electrode in (a) 0.1 M NaOH electrolyte, (b) 0.1 M PBS electrolyte (pH = 7.4) at various conc. of cholesterol, (c) at various conc. of blood serum sample, extracted from Fig. 2.

Furthermore, in order to authenticate the pertinency of the proposed sensor in practical applications for the detection of cholesterol, NiVP/Pi catalyst was analyzed in real sample using human blood serum via standard addition method. Blood serum sample was injected in 0.1 M NaOH electrolyte and known amounts of cholesterol in the test solution was added. The obtained results are tabulated in Table S2 (SI). The recovery of the spiked sample was found from 97 to 106, which governs the applicability of the proposed sensor for real time analysis as well.

**Table S2.** Human serum sample analysis with NiVP/Pi modified electrode.

| <b>Sample</b> | <b>Actual Conc.</b> | <b>Conc. (Added)</b> | <b>Conc. (found)</b> | <b>Recovery (%)</b> |
|---------------|---------------------|----------------------|----------------------|---------------------|
| <b>1.</b>     | 5 $\mu$ M           | 100 $\mu$ M          | 102 $\mu$ M          | 97                  |
| <b>2.</b>     | 5 $\mu$ M           | 200 $\mu$ M          | 202 $\mu$ M          | 98.5                |
| <b>3.</b>     | 5 $\mu$ M           | 300 $\mu$ M          | 325 $\mu$ M          | 106                 |
| <b>4.</b>     | 5 $\mu$ M           | 500 $\mu$ M          | 516 $\mu$ M          | 102                 |

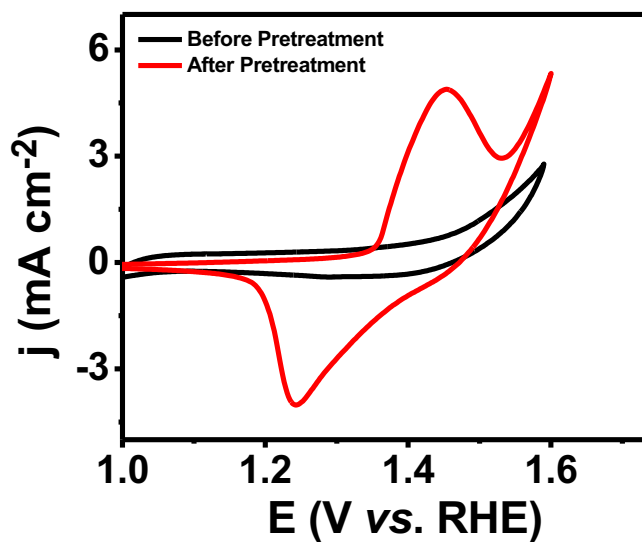

**Figure S8.** Cyclic voltammograms of pretreated NiVP/Pi over paper electrode in 0.1 M PBS electrolyte (pH =7.4); CE: Pt wire, RE: double junction Ag/AgCl/3 M KCl.

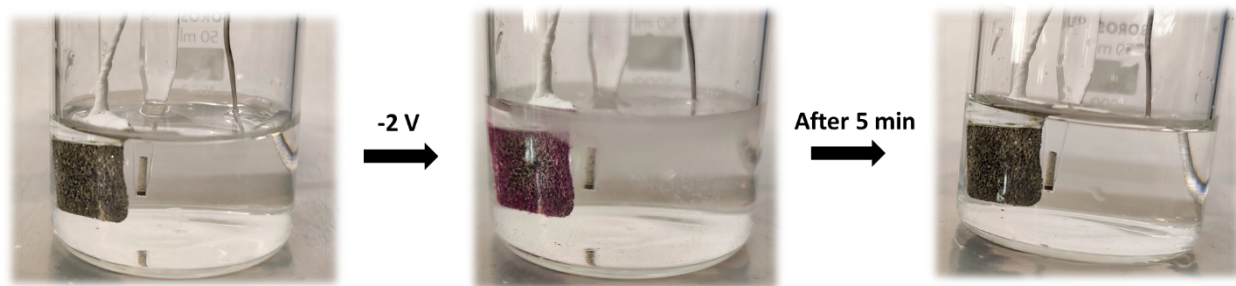

**Figure S9.** Photographs displaying pH change after applying -2 V in 0.1 M PBS (pH 7.4) solution containing 5  $\mu$ L of 5% phenolphthalein (in ethanol) in the electrochemical cell; CE: Pt wire, RE: double junction Ag/AgCl/3 M KCl.

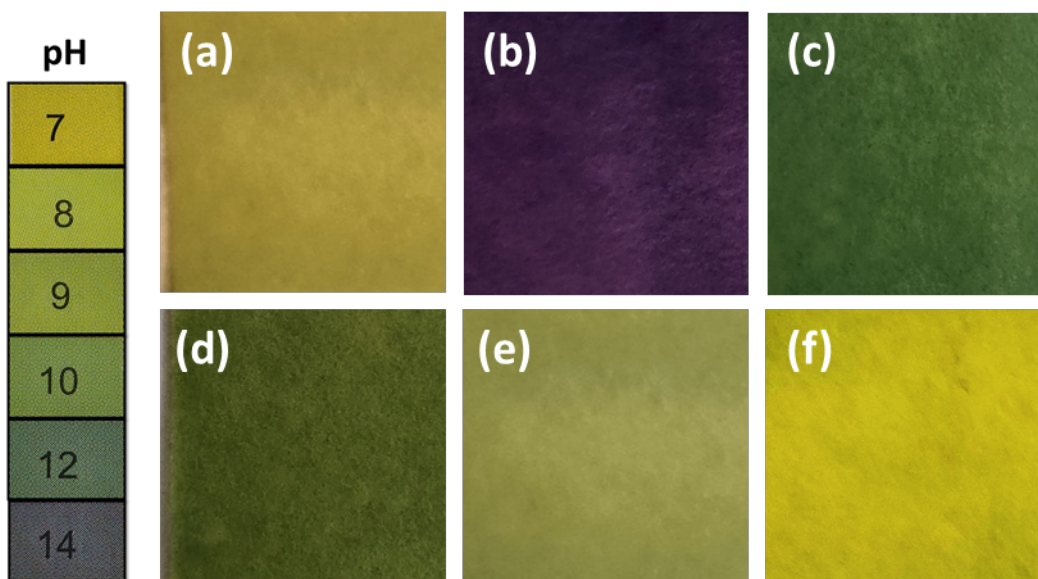

**Figure S10.** The color change on pH test strips of solution samples under steady conditions at different time, (a) before pretreated, (b-f) after pretreated for 0.5 min, 1 min, 2 min, 5 min, 7 min.

The local pH at the electrode/electrolyte interface was adjusted by applying a preconditioning potential (-2 V) on the NiVP/Pi electrode (Fig. S8A, ESI†) and the pH change at the electrode-electrolyte interface was demonstrated by the appearance of pink color from colorless due to phenolphthalein addition during the pretreatment process, suggesting the pH change from neutral to alkaline (Fig. S8B, ESI†). Interestingly, after pretreatment, the pH near the working electrode gradually decreased and it was shown by the color change from pink back to colorless because of diffusion of ions leading to neutralization with phosphate buffer. It was well supported by pH strip studies showing change of pH from 7.4 to about 13 at different time intervals using a glass capillary near working electrode (Fig. S8C, ESI†). Furthermore, 30 seconds was chosen as appropriate time period for the change of pH to  $\approx 14$ , as investigated by pH meter studies, which led to alkaline environment for nonenzymatic detection of cholesterol.

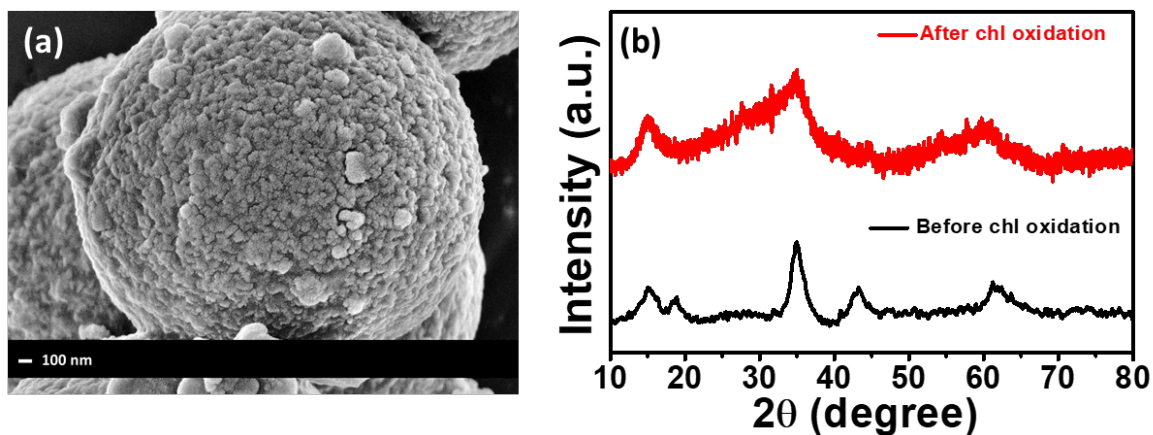

**Figure S11.** (a) SEM images and (b) XRD pattern of NiVP/Pi catalyst after electrochemical cholesterol oxidation.

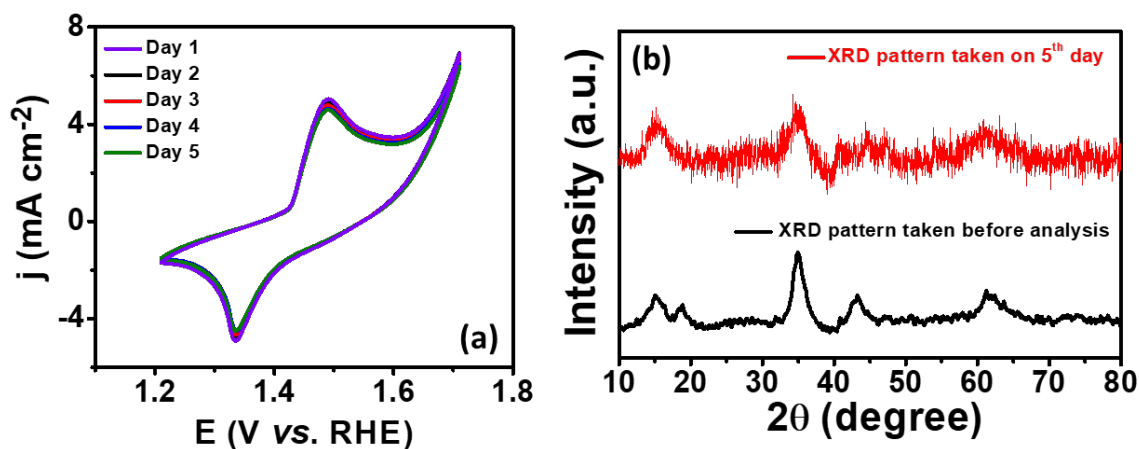

**Figure S12.** (a) Cyclic voltammograms of NiVP/Pi catalyst coated over paper electrode at 5 mM of cholesterol in 0.1 M PBS electrolyte (pH = 7.4); CE: Pt wire, RE: double junction Ag/AgCl/3 M KCl and (b) XRD patterns of NiVP/Pi catalyst before and after 5 days of analysis of electrochemical cholesterol oxidation.

**Table S3.** Comparison of analytical performance of cholesterol sensor with various modified electrodes reported previously.

| Catalyst                                                            | Concentration range                     | Limit of detection       | Sensitivity                                   | Selectivity             | Stability                                              | Real sample analysis         | Ref. |
|---------------------------------------------------------------------|-----------------------------------------|--------------------------|-----------------------------------------------|-------------------------|--------------------------------------------------------|------------------------------|------|
| Cu <sub>2</sub> S NRS/CRIE                                          | 0.01 – 0.68 mM                          | 0.1 μM                   | 62.5 μA mM <sup>-1</sup>                      | No interference         | 92% retention after 30 days                            | –                            | 2    |
| Au NPs/rGO-PAMAM-Fc                                                 | 0.0004 – 15.36 mM                       | 0.01 μM                  | –                                             | No interference         | 80% retention on 12 <sup>th</sup> repeated measurement | Human blood serum            | 3    |
| Chox/MoS <sub>2</sub> -AuNPs/GCE                                    | 0.5 – 48 μM                             | 0.26 ± 0.015 μM          | 4460 μA mM <sup>-1</sup> cm <sup>-2</sup>     | Little interference     | Upto 14 days                                           | Raw egg yolk and pork sample | 4    |
| Cu <sub>2</sub> O-TiO <sub>2</sub>                                  | 24.4 – 622 μM                           | 0.05 μM                  | 6034.04 μA mM <sup>-1</sup> cm <sup>-2</sup>  | Negligible interference | 84% after 10 CV cycles                                 | Human blood serum            | 5    |
| α-Fe <sub>2</sub> O <sub>3</sub>                                    | 0.1-8.0 mM                              | 0.018 mM                 | 78.56 μA mM <sup>-1</sup> cm <sup>-2</sup>    | Negligible interference | 97% retention after 2 weeks                            | Human blood serum            | 6    |
| CuO-NPs                                                             | 1 μM to 15 μM                           | 0.43 μM                  | 1098.37 μA mM <sup>-1</sup> cm <sup>-2</sup>  | Negligible interference |                                                        | Human blood serum            | 7    |
| ZnO nanoparticle                                                    | 0.001 – 0.5 μM                          |                          | 23.7 μA mM <sup>-1</sup> cm <sup>-2</sup>     |                         |                                                        |                              | 8    |
| NiO/CVD-grown graphene                                              | 2 – 40 μM                               | 0.13 μM                  | 40.6 mA μM <sup>-1</sup> cm <sup>-2</sup>     | Negligible interference | 2 days                                                 | Milk sample                  | 9    |
| micro-needle patch and nanoporous platinum (NPt) sensing electrodes | -                                       | -                        | 305 nA mM <sup>-1</sup> cm <sup>-2</sup>      | -                       | -                                                      | -                            | 10   |
| MIP-AuNPs-PDA-DGr/GCE                                               | 10 <sup>-18</sup> - 10 <sup>-13</sup> M | 3.3×10 <sup>-19</sup> M  | –                                             | –                       | 97.4% retention after 40 days                          | Human blood serum            | 11   |
| PANInf-GMF                                                          | 1.93 to 464.04 mg dl <sup>-1</sup>      | 1.93 mg dl <sup>-1</sup> | 0.101 μA mg <sup>-1</sup> dl cm <sup>-2</sup> | No interference         | up to 12 weeks                                         | -                            | 12   |
| α-Fe <sub>2</sub> O <sub>3</sub>                                    | 0.1-8.0 mM                              | 0.018 mM                 | 78.56 μA mM <sup>-1</sup> cm <sup>-2</sup>    | Negligible interference | 97% retention after 2 weeks                            | Human blood serum            | 6    |

|                                                                                       |                                        |                                            |                                                               |                                  |                                  |                   |    |
|---------------------------------------------------------------------------------------|----------------------------------------|--------------------------------------------|---------------------------------------------------------------|----------------------------------|----------------------------------|-------------------|----|
| ZnO@ZnS                                                                               | 0.4 – 3.0 mM                           | 0.02 mM                                    | 52.67 mA M <sup>-1</sup> cm <sup>-2</sup>                     | < 5% interference                | 5% after 30 days                 | –                 | 13 |
| Au-/nPts                                                                              | -                                      | 0.015 mM                                   | 226.2 μA mM <sup>-1</sup> cm <sup>-2</sup>                    | No interference                  | –                                | –                 | 14 |
| Ru-Pi-PPy/CFP                                                                         | 0.16 - 20 nM                           | 0.54 × 10 <sup>-10</sup> M                 | 19988 μA μM <sup>-1</sup> cm <sup>-2</sup>                    | 3% interference                  | 30 days                          | Human blood serum | 15 |
| Cu-Ni bimetal-dispersed carbon nanofiber/polymer nanocomposite (BMCP)-based electrode | 0.04 - 600 mg dL <sup>-1</sup>         | 0.002 mg dL <sup>-1</sup>                  | 226.30 μA mM <sup>-1</sup> cm <sup>-2</sup>                   | Small interference by AA         | 8 months                         | Human blood serum | 16 |
| CoMnHCF                                                                               | 50 - 150 μM                            | 30 μM                                      | 385 mA M <sup>-1</sup> cm <sup>-2</sup>                       | Negligible interference          | –                                | –                 | 17 |
|                                                                                       | 150 -1000 μM                           |                                            | 80 mA M <sup>-1</sup> cm <sup>-2</sup>                        |                                  |                                  |                   |    |
| GO&CHER&CHOD/Au NPs/SPE                                                               | 0.01 - 5000 μgmL <sup>-1</sup>         | 0.001 μgm L <sup>-1</sup>                  | 0.084 μA cm <sup>2</sup> μgmL <sup>-1</sup>                   | Little interference              | 86.58% retention after 15 days   | –                 | 18 |
| MB/BCD/Fe <sub>3</sub> O <sub>4</sub> /SPCE                                           | 0 - 150 μM                             | 2.88 μM                                    | 0.015 μA μM <sup>-1</sup>                                     | Negligible interference          | –                                | Milk sample       | 19 |
| Grp/β-CD/Methylene Blue                                                               | 0.01 - 0.10 mM                         | –                                          | 0.01 μA μM <sup>-1</sup>                                      | Negligible interference          | 100 CV cycles                    | –                 | 20 |
| ChEt–ChOx/n - NiFe <sub>2</sub> O <sub>4</sub> –CH/ITO                                | 5 - 400 mg dL <sup>-1</sup>            | 24.46 mg dL <sup>-1</sup> cm <sup>-2</sup> | 1.73 μA (mg dL <sup>-1</sup> cm <sup>-2</sup> ) <sup>-1</sup> | Insignificant interference       | 78% retention after 90 days      | Human blood serum | 21 |
| Pt-NCs                                                                                | 2 - 486 μM                             | 2 μM                                       | 132 μA mM <sup>-1</sup> cm <sup>-2</sup>                      | Suppressed interference at 0.3 V | 79% retention after 3 weeks      | Human blood serum | 22 |
| NRs-NiO                                                                               | 1.5 - 10.3 mM                          | –                                          | 0.12 mA mM <sup>-1</sup> cm <sup>-2</sup>                     | Negligible interference by UA    | 95% retention after 3 weeks      | –                 | 23 |
| β-CD@N-GQD                                                                            | 0.5 - 100 μM                           | 80 nM                                      | –                                                             | Limited interference             | 87% retention after 28 days      | Serum sample      | 24 |
| GC/Chi-Ni(OH) <sub>2</sub> /Chox/NF                                                   | 0.45 - 10 mM                           | 49 μM                                      | –                                                             | –                                | 3 months                         | –                 | 25 |
| PANI/MWCNTs/Starch                                                                    | 0.032 - 5 mM                           | 0.01 mM                                    | 800 μA mM <sup>-1</sup> cm <sup>-2</sup>                      | Higher selectivity than AA       | More than 3 years                | Cow milk          | 26 |
| AuNPs–MWNTs/GCE                                                                       | 10 <sup>-13</sup> - 10 <sup>-9</sup> M | 3.3 10 <sup>-14</sup> M                    | –                                                             | Low interference                 | 91.68% retention after one month | –                 | 27 |



|                              |                                                                                               |                            |                                                                                                                                                       |                                      |                                  |                          |                  |
|------------------------------|-----------------------------------------------------------------------------------------------|----------------------------|-------------------------------------------------------------------------------------------------------------------------------------------------------|--------------------------------------|----------------------------------|--------------------------|------------------|
| PEDOT/TA composite           | 3 $\mu\text{M}$ - 1 mM                                                                        | 0.95 $\mu\text{M}$         | -                                                                                                                                                     | Nearly selective                     | 87% retention after one month    | Egg yolk sample          | 28               |
| Au/CdS QDs/TNTs              | 0.024 - 1.2 mM                                                                                | $\sim 0.012$ $\mu\text{M}$ | 10,790 $\mu\text{A mM}^{-1} \text{cm}^{-2}$                                                                                                           | Negligible interference              | 92.7% retention after 4 weeks    | Human blood serum        | 29               |
| Au NPs                       | 5–5000 $\mu\text{g/mL}$                                                                       | 3.0 $\mu\text{g/mL}$       |                                                                                                                                                       | Negligible interference              | 25% loss after 10 measurements   |                          | 30               |
| Oxidized Zn–In nanostructure | 0.5 mM – 09 mM                                                                                |                            | 81 $\mu\text{A mM}^{-1} \text{cm}^{-2}$                                                                                                               |                                      |                                  |                          | 31               |
| PVIM–CosPOM/MNC              | 1 fM - 200 nM;<br><br>0.5 $\mu\text{M}$ - 5 mM                                                | 1 fM                       | 210 $\mu\text{A } \mu\text{M}^{-1} \text{cm}^{-2}$<br><br>64 $\mu\text{A } \mu\text{M}^{-1} \text{cm}^{-2}$                                           | Small interference in presence of AA | 100 consecutive CV cycles        | Human blood serum        | 32               |
| <b>NiVP/Pi</b>               | <b>1 nM - 10 <math>\mu\text{M}</math>;</b><br><br><b>100 <math>\mu\text{M}</math> - 10 mM</b> | <b>1 aM</b>                | <b>5510.18 <math>\mu\text{A } \mu\text{M}^{-1} \text{cm}^{-2}</math></b><br><br><b>36.8 <math>\mu\text{A } \mu\text{M}^{-1} \text{cm}^{-2}</math></b> | <b>Negligible interference</b>       | <b>100 consecutive CV cycles</b> | <b>Human blood serum</b> | <b>This Work</b> |

## Reference:

1. N. Thakur, D. Mandal and T. C. Nagaiah, *J. Mater. Chem. B*, 2021, **9**, 8399-8405.
2. R. Ji, L. Wang, G. Wang and X. Zhang, *Electrochim. Acta*, 2014, **130**, 239-244.
3. J. Zhu, Z. Ye, X. Fan, H. Wang, Z. Wang and B. Chen, *Int. J. Nanomedicine*, 2019, **14**, 835.
4. X. Lin, Y. Ni and S. Kokot, *Sens. Actuators B Chem.*, 2016, **233**, 100-106.
5. N. Khaliq, M. A. Rasheed, G. Cha, M. Khan, S. Karim, P. Schmuki and G. Ali, *Sens. Actuators B Chem.*, 2020, **302**, 127200.
6. A. Umar, R. Ahmad, S. W. Hwang, S. H. Kim, A. Al-Hajry and Y. B. Hahn, *Electrochim. Acta*, 2014, **135**, 396-403.
7. Q. Wu, L. He, Z. W. Jiang, Y. Li, Z. M. Cao, C. Z. Huang and Y. F. Li, *Biosens. Bioelectron.*, 2019, **145**, 111704.
8. A. Umar, M. Rahman, M. Vaseem and Y.-B. Hahn, *Electrochem. Commun.*, 2009, **11**, 118-121.
9. A. Rengaraj, Y. Haldorai, C. H. Kwak, S. Ahn, K.-J. Jeon, S. H. Park, Y.-K. Han and Y. S. Huh, *J. Mater. Chem. B*, 2015, **3**, 6301-6309.
10. H. Yoon, S. Lee, J. Park, S.-J. Paik and M. G. Allen, *SENSORS*, 2014 IEEE, 2014.
11. H. Yang, L. Li, Y. Ding, D. Ye, Y. Wang, S. Cui and L. Liao, *Biosens. Bioelectron.*, 2017, **92**, 748-754.
12. G. Lakshmi, A. Sharma, P. R. Solanki and D. Avasthi, *Nanotechnology*, 2016, **27**, 345101.

13. A. K. Giri, C. Charan, A. Saha, V. K. Shahi and A. B. Panda, *J. Mater. Chem. A*, 2014, **2**, 16997-17004.
14. Y.-J. Lee and J.-Y. Park, *Biosens. Bioelectron.*, 2010, **26**, 1353-1358.
15. K. Akshaya, A. Varghese, M. Nidhin and L. George, *J. Electrochem. Soc.*, 2019, **166**, B1016.
16. P. K. Bairagi and N. Verma, *J. Electroanal. Chem.*, 2018, **814**, 134-143.
17. M. Antuch, Y. Matos-Peralta, D. Llanes, F. Echevarría, J. Rodríguez-Hernández, M. H. Marin, A. M. Díaz-García and L. Reguera, *ChemElectroChem*, 2019, **6**, 1567-1573.
18. Y. Huang, J. Tan, L. Cui, Z. Zhou, S. Zhou, Z. Zhang, R. Zheng, Y. Xue, M. Zhang and S. Li, *Biosens. Bioelectron.*, 2018, **102**, 560-567.
19. S. J. Willyam, E. Saepudin and T. A. Ivandini, *Anal. Methods*, 2020, **12**, 3454-3461.
20. N. Agnihotri, A. D. Chowdhury and A. De, *Biosens. Bioelectron.*, 2015, **63**, 212-217.
21. J. Singh, A. Roychoudhury, M. Srivastava, V. Chaudhary, R. Prasanna, D. W. Lee, S. H. Lee and B. Malhotra, *J. Phys. Chem. C*, 2013, **117**, 8491-8502.
22. K. S. Eom, Y. J. Lee, H. W. Seo, J. Y. Kang, J. S. Shim and S. H. Lee, *Analyst*, 2020, **145**, 908-916.
23. M. A. Ali, P. R. Solanki, M. K. Patel, H. Dhayani, V. V. Agrawal, R. John and B. D. Malhotra, *Nanoscale*, 2013, **5**, 2883-2891.
24. A. B. Ganganboina and R.-a. Doong, *Microchim. Acta*, 2018, **185**, 526.
25. K. Selvarani and S. Berchmans, *J. Electrochem. Soc.*, 2017, **164**, H561.
26. V. Gautam, K. P. Singh and V. L. Yadav, *Anal. Bioanal. Chem.*, 2018, **410**, 2173-2181.
27. J. Ji, Z. Zhou, X. Zhao, J. Sun and X. Sun, *Biosens. Bioelectron.*, 2015, **66**, 590-595.
28. P. Thivya, R. Ramya and J. Wilson, *Microchem. J.*, 2020, **157**, 105037.
29. N. Khaliq, M. A. Rasheed, M. Khan, M. Maqbool, M. Ahmad, S. Karim, A. Nisar, P. Schmuki, S. O. Cho and G. Ali, *ACS Appl. Mater. Interfaces*, 2021, **13**, 3653-3668.
30. Y. Huang, L. Cui, Y. Xue, S. Zhang, N. Zhu, J. Liang and G. Li, *Mater. Sci. Eng. C*, 2017, **77**, 1-8.
31. S. Khan, M. A. Rasheed, A. Shah, A. Mahmood, A. Waheed, S. Karim, M. Khan and G. Ali, *Mater. Sci. Semicond. Process.*, 2021, **135**, 106101.
32. N. Thakur, M. Kumar, S. Das Adhikary, D. Mandal and T. C. Nagaiah, *Chem. Commun.*, 2019, **55**, 5021-5024.
